# Supplementary material
Source: PubMed Central journal article supplement (PMC7554079)

## Predicting Postpartum Hemorrhage After Vaginal Birth by Labor Phenotype

**Supplementary Figure 1:** Sample identification procedure for analysis of Consortium for Safe Labor dataset on postpartum hemorrhage following vaginal birth.

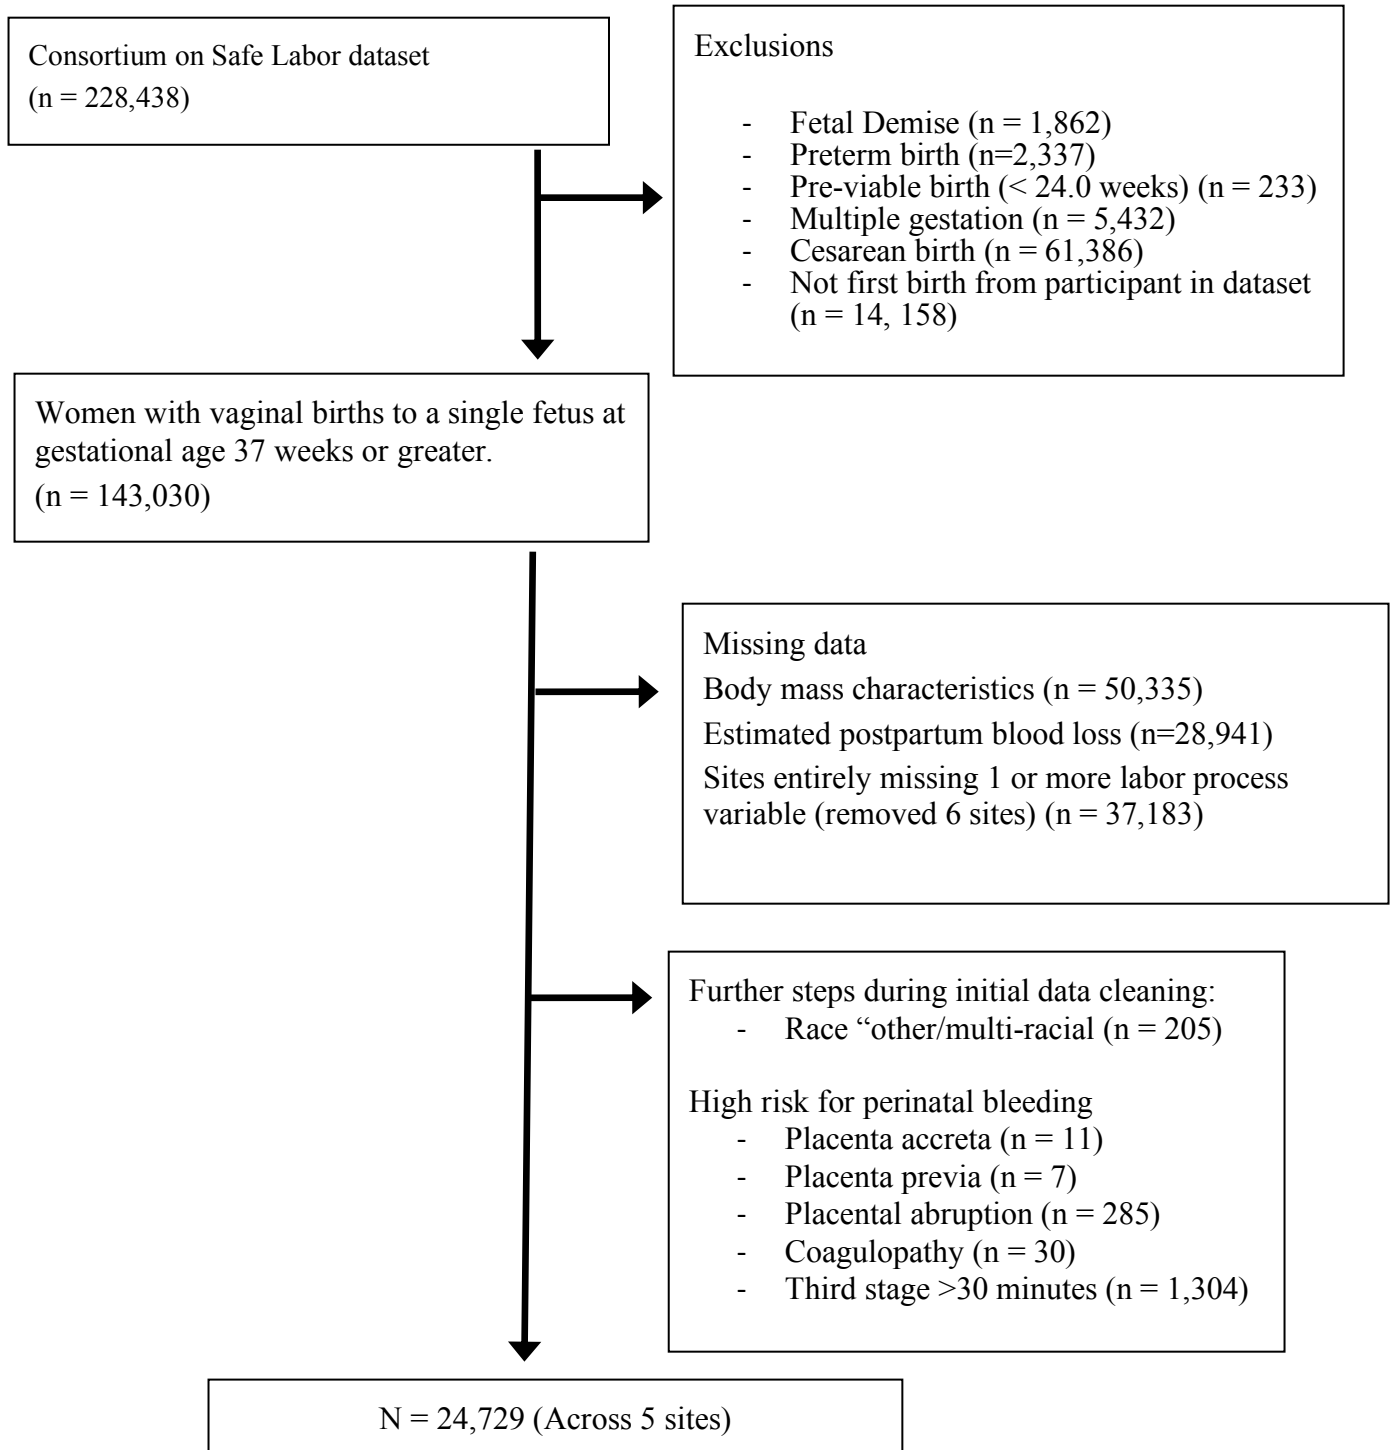

Supplement: NIHMS1595373-supplement-Supplemental_Figure_1.pdf [file NIHMS1595373-supplement-Supplemental_Figure_1.pdf]
