# Supplementary material
Source: PubMed Central journal article supplement (PMC7554079)
Supplement: NIHMS1595373-supplement-Supplemental_Table_1.pdf [file NIHMS1595373-supplement-Supplemental_Table_1.pdf]

# 1 Predicting Postpartum Hemorrhage After Vaginal Birth by Labor Phenotype

**Supplemental Table 1: Fit Statistics for Latent Class Analysis of Consortium for Safe Labor Births  
Labor of 15 Process Variables**

| Class | Akaike Information Criteria | Bayesian Information Criteria | Percent / Class                           | Entropy | Minimum Posterior Probability | VLMR LRT p-value | LMR Adjusted LRT p-value | PBS LRT p-value |
|-------|-----------------------------|-------------------------------|-------------------------------------------|---------|-------------------------------|------------------|--------------------------|-----------------|
| 2     | 886594                      | 886976                        | 58.3<br>41.7                              | 0.835   | 0.87                          | <0.001           | <0.001                   | <0.001          |
| 3     | 871081                      | 871633                        | 32.5<br>57.2<br>10.2                      | 0.862   | 0.87                          | <0.001           | <0.001                   | <0.001          |
| 4     | 860177                      | 860900                        | 48.2<br>30.5<br>13.8<br>7.4               | 0.909   | 0.89                          | <0.001           | <0.001                   | <0.001          |
| 5     | 852014                      | 852907                        | 45.2<br>30.3<br>7.2<br>4.9<br>12.4        | 0.912   | 0.89                          | <0.001           | <0.001                   | <0.001          |
| 6     | 845200                      | 846263                        | 9.5<br>27.2<br>6.5<br>11.4<br>44.4<br>0.8 | 0.908   | 0.88                          | 0.11             | 0.11                     | <0.001          |
| 7     | 839576                      | 840810                        | 6.2<br>11.6<br>9.3<br>26.3<br>0.8<br>42.3 | 0.912   | 0.88                          | <0.001           | <0.001                   | <0.001          |

|  |  |  |      |  |  |  |  |  |
|--|--|--|------|--|--|--|--|--|
|  |  |  | 0.03 |  |  |  |  |  |
|--|--|--|------|--|--|--|--|--|

Abbreviations: VLMR, Vuong-Lo-Mendell-Rubin; LMR, Lo-Mendell-Rubin; PBS, Parametric Boot-Strapped; LRT, Likelihood Ratio Test
